# Supplementary material for: Health-related impact on quality of life and coping strategies for chikungunya: A qualitative study in Curaçao
Source: PubMed Central journal article supplement (PMC5648258; doi:10.1371/journal.pntd.0005987), 2017-10-09
Supplement: pntd.0005987.s001.pdf [file pntd.0005987.s001.pdf]

Consolidated criteria for reporting qualitative studies (COREQ): 32-item checklist

| No                                                                                                                                                                                                                                                                                                                                                                                                                                                                                                                                                                                                                                                                                                                                                                                                                                                                                                                                                                      | Item                                     | Guide questions/description                                                                                                                                     | Answer-/ position in article                                                                                       |
|-------------------------------------------------------------------------------------------------------------------------------------------------------------------------------------------------------------------------------------------------------------------------------------------------------------------------------------------------------------------------------------------------------------------------------------------------------------------------------------------------------------------------------------------------------------------------------------------------------------------------------------------------------------------------------------------------------------------------------------------------------------------------------------------------------------------------------------------------------------------------------------------------------------------------------------------------------------------------|------------------------------------------|-----------------------------------------------------------------------------------------------------------------------------------------------------------------|--------------------------------------------------------------------------------------------------------------------|
| <b>Domain 1: Research team and reflexivity</b>                                                                                                                                                                                                                                                                                                                                                                                                                                                                                                                                                                                                                                                                                                                                                                                                                                                                                                                          |                                          |                                                                                                                                                                 |                                                                                                                    |
| <i>Personal Characteristics</i>                                                                                                                                                                                                                                                                                                                                                                                                                                                                                                                                                                                                                                                                                                                                                                                                                                                                                                                                         |                                          |                                                                                                                                                                 |                                                                                                                    |
| 1.                                                                                                                                                                                                                                                                                                                                                                                                                                                                                                                                                                                                                                                                                                                                                                                                                                                                                                                                                                      | Interviewer/facilitator                  | Which author/s conducted the interview or focus group?                                                                                                          | See Methods – Data Collection                                                                                      |
| 2.                                                                                                                                                                                                                                                                                                                                                                                                                                                                                                                                                                                                                                                                                                                                                                                                                                                                                                                                                                      | Credentials                              | What were the researcher's credentials? <i>E.g. PhD, MD</i>                                                                                                     | See box on the left.                                                                                               |
| 3.                                                                                                                                                                                                                                                                                                                                                                                                                                                                                                                                                                                                                                                                                                                                                                                                                                                                                                                                                                      | Occupation                               | What was their occupation at the time of the study?                                                                                                             |                                                                                                                    |
| 4.                                                                                                                                                                                                                                                                                                                                                                                                                                                                                                                                                                                                                                                                                                                                                                                                                                                                                                                                                                      | Gender                                   | Was the researcher male or female?                                                                                                                              |                                                                                                                    |
| 5.                                                                                                                                                                                                                                                                                                                                                                                                                                                                                                                                                                                                                                                                                                                                                                                                                                                                                                                                                                      | Experience and training                  | What experience or training did the researcher have?                                                                                                            |                                                                                                                    |
| <p><b>Answers on criteria 2-5.</b></p> <p>Authors:</p> <ul style="list-style-type: none"> <li>- Jelte Elsinga, BSc – male, MD PhD candidate, master courses in qualitative research methods.</li> <li>- Martin P. Grobusch MD PhD – male, professor, extensive experience in clinical practice, research and public health.</li> <li>- Adriana Tami MD PhD – female, assistant professor, extensive experience in clinical research and public health.</li> <li>- Izzy Gerstenbluth MD – head of epidemiology and research unit Curaçao, extensive experience in clinical practice and public health of Curaçao.</li> <li>- Ajay Bailey PhD – male, assistant professor, anthropologist with extensive experience in qualitative research and health behaviour.</li> </ul> <p>Interviewers:</p> <ul style="list-style-type: none"> <li>- Martha Gillen – female, retired public health nurse.</li> <li>- Billy Hoogenbergen – male, retired psychotherapist.</li> </ul> |                                          |                                                                                                                                                                 |                                                                                                                    |
| <i>Relationship with participants</i>                                                                                                                                                                                                                                                                                                                                                                                                                                                                                                                                                                                                                                                                                                                                                                                                                                                                                                                                   |                                          |                                                                                                                                                                 |                                                                                                                    |
| 6.                                                                                                                                                                                                                                                                                                                                                                                                                                                                                                                                                                                                                                                                                                                                                                                                                                                                                                                                                                      | Relationship established                 | Was a relationship established prior to study commencement?                                                                                                     | No                                                                                                                 |
| 7.                                                                                                                                                                                                                                                                                                                                                                                                                                                                                                                                                                                                                                                                                                                                                                                                                                                                                                                                                                      | Participant knowledge of the interviewer | What did the participants know about the researcher? <i>e.g. personal goals, reasons for doing the research</i>                                                 | There was an informed consent taken, signed by all participants.                                                   |
| 8.                                                                                                                                                                                                                                                                                                                                                                                                                                                                                                                                                                                                                                                                                                                                                                                                                                                                                                                                                                      | Interviewer characteristics              | What characteristics were reported about the interviewer/facilitator? <i>e.g. Bias, assumptions, reasons and interests in the research topic</i>                | Researcher-bias; see Discussion.                                                                                   |
| <b>Domain 2: study design</b>                                                                                                                                                                                                                                                                                                                                                                                                                                                                                                                                                                                                                                                                                                                                                                                                                                                                                                                                           |                                          |                                                                                                                                                                 |                                                                                                                    |
| <i>Theoretical framework</i>                                                                                                                                                                                                                                                                                                                                                                                                                                                                                                                                                                                                                                                                                                                                                                                                                                                                                                                                            |                                          |                                                                                                                                                                 |                                                                                                                    |
| 9.                                                                                                                                                                                                                                                                                                                                                                                                                                                                                                                                                                                                                                                                                                                                                                                                                                                                                                                                                                      | Methodological orientation and Theory    | What methodological orientation was stated to underpin the study? <i>e.g. grounded theory, discourse analysis, ethnography, phenomenology, content analysis</i> | Principles of grounded theory for analyses, but theory informed empirical fieldwork. See methods - Data collection |
| <i>Participant selection</i>                                                                                                                                                                                                                                                                                                                                                                                                                                                                                                                                                                                                                                                                                                                                                                                                                                                                                                                                            |                                          |                                                                                                                                                                 |                                                                                                                    |
| 10.                                                                                                                                                                                                                                                                                                                                                                                                                                                                                                                                                                                                                                                                                                                                                                                                                                                                                                                                                                     | Sampling                                 | How were participants selected? <i>e.g. purposive, convenience, consecutive, snowball</i>                                                                       | See methods - Study design and participants recruitment                                                            |
| 11.                                                                                                                                                                                                                                                                                                                                                                                                                                                                                                                                                                                                                                                                                                                                                                                                                                                                                                                                                                     | Method of approach                       | How were participants approached? <i>e.g. face-to-face, telephone, mail, email</i>                                                                              | See methods - Study design and participants recruitment                                                            |
| 12.                                                                                                                                                                                                                                                                                                                                                                                                                                                                                                                                                                                                                                                                                                                                                                                                                                                                                                                                                                     | Sample size                              | How many participants were in the study?                                                                                                                        | See Table 1                                                                                                        |
| 13.                                                                                                                                                                                                                                                                                                                                                                                                                                                                                                                                                                                                                                                                                                                                                                                                                                                                                                                                                                     | Non-participation                        | How many people refused to participate or dropped out? Reasons?                                                                                                 | Refused: not known for those recruited via physicians;<br>Dropped out: none.                                       |
| <i>Setting</i>                                                                                                                                                                                                                                                                                                                                                                                                                                                                                                                                                                                                                                                                                                                                                                                                                                                                                                                                                          |                                          |                                                                                                                                                                 |                                                                                                                    |
| 14.                                                                                                                                                                                                                                                                                                                                                                                                                                                                                                                                                                                                                                                                                                                                                                                                                                                                                                                                                                     | Setting of data collection               | Where was the data collected? <i>e.g. home, clinic, workplace</i>                                                                                               | See Methods – Data collection                                                                                      |
| 15.                                                                                                                                                                                                                                                                                                                                                                                                                                                                                                                                                                                                                                                                                                                                                                                                                                                                                                                                                                     | Presence of non-participants             | Was anyone else present besides the participants and researchers?                                                                                               | See Methods – Data collection                                                                                      |
| 16.                                                                                                                                                                                                                                                                                                                                                                                                                                                                                                                                                                                                                                                                                                                                                                                                                                                                                                                                                                     | Description of sample                    | What are the important characteristics of the sample? <i>e.g. demographic data, date</i>                                                                        | See Table 1                                                                                                        |
| <i>Data collection</i>                                                                                                                                                                                                                                                                                                                                                                                                                                                                                                                                                                                                                                                                                                                                                                                                                                                                                                                                                  |                                          |                                                                                                                                                                 |                                                                                                                    |

Consolidated criteria for reporting qualitative studies (COREQ): 32-item checklist

|                                        |                                |                                                                                                                                          |                                                                               |
|----------------------------------------|--------------------------------|------------------------------------------------------------------------------------------------------------------------------------------|-------------------------------------------------------------------------------|
| 17.                                    | Interview guide                | Were questions, prompts, guides provided by the authors?<br>Was it pilot tested?                                                         | Yes. See Methods – Data collection & Supporting Information 1 and 2           |
| 18.                                    | Repeat interviews              | Were repeat interviews carried out? If yes, how many?                                                                                    | No                                                                            |
| 19.                                    | Audio/visual recording         | Did the research use audio or visual recording to collect the data?                                                                      | Yes. See Methods – Data collection                                            |
| 20.                                    | Field notes                    | Were field notes made during and/or after the interview or focus group?                                                                  | Yes. See Methods – Data collection                                            |
| 21.                                    | Duration                       | What was the duration of the interviews or focus group?                                                                                  | In-depth interviews: 35-100 minutes<br>Focus group discussions: 65-85 minutes |
| 22.                                    | Data saturation                | Was data saturation discussed?                                                                                                           | Yes. See Methods – Data collection                                            |
| 23.                                    | Transcripts returned           | Were transcripts returned to participants for comment and/or correction?                                                                 | No                                                                            |
| <b>Domain 3: analysis and findings</b> |                                |                                                                                                                                          |                                                                               |
| <i>Data analysis</i>                   |                                |                                                                                                                                          |                                                                               |
| 24.                                    | Number of data coders          | How many data coders coded the data?                                                                                                     | 1                                                                             |
| 25.                                    | Description of the coding tree | Did authors provide a description of the coding tree?                                                                                    | See Methods – Data Analysis                                                   |
| 26.                                    | Derivation of themes           | Were themes identified in advance or derived from the data?                                                                              | See Methods – Data Analysis                                                   |
| 27.                                    | Software                       | What software, if applicable, was used to manage the data?                                                                               | See Methods – Data Analysis                                                   |
| 28.                                    | Participant checking           | Did participants provide feedback on the findings?                                                                                       | No, but findings were discussed with local experts.                           |
| <i>Reporting</i>                       |                                |                                                                                                                                          |                                                                               |
| 29.                                    | Quotations presented           | Were participant quotations presented to illustrate the themes / findings? Was each quotation identified? e.g. <i>participant number</i> | See Results                                                                   |
| 30.                                    | Data and findings consistent   | Was there consistency between the data presented and the findings?                                                                       | See Results                                                                   |
| 31.                                    | Clarity of major themes        | Were major themes clearly presented in the findings?                                                                                     | See Results                                                                   |
| 32.                                    | Clarity of minor themes        | Is there a description of diverse cases or discussion of minor themes?                                                                   | See Results                                                                   |
